# Supplementary material
Source: PubMed Central journal article supplement (PMC2650163)
Supplement: 0809919106_ST4_PDF.pdf [file 0809919106_ST4_PDF.pdf]

**Table S4.** Differentially expressed genes involved in regulation of mucosal immune tolerance in healthy adults

| Protein           | Function                                                                                                                            | bacterial treatment    |                  |                    |
|-------------------|-------------------------------------------------------------------------------------------------------------------------------------|------------------------|------------------|--------------------|
|                   |                                                                                                                                     | stationary-<br>placebo | dead-<br>placebo | midlog-<br>placebo |
| BAFF              | B cell activation factor from TNF family promoting Ig class switching                                                               | n.s.                   | n.s.             | n.s.               |
| APRIL             | B cell proliferation inducing ligand promoting Ig class switching                                                                   | 1.11<br>(0.03)         | n.s.             | n.s.               |
| TSLP <sup>1</sup> | activates and stimulates survival of immune cell types including DCs and CD4+ T cells                                               | -                      | -                | -                  |
| AID <sup>1</sup>  | deaminase induced during immune responses that is involved in Ig class switching                                                    | -                      | -                | -                  |
| SLPI              | conferring protection of epithelia from attack by endogenous proteolytic enzymes during immune responses                            | -1.44<br>(0.01)        | -1.23<br>(0.04)  | n.s.               |
| TREM1             | receptor triggering inflammation expressed on myeloid cells                                                                         | n.s.                   | n.s.             | -1.17<br>(0.048)   |
| TREML1            | co-regulation of TREM receptors, amplification of inflammatory signals                                                              | n.s.                   | -1.23<br>(0.006) | -1.24<br>(0.02)    |
| TNF- $\alpha$     | proinflammatory cytokine involved in cell proliferation, differentiation, apoptosis and coagulation; mainly secreted by macrophages | n.s.                   | 1.19<br>(0.02)   | n.s.               |
| TNFRSF11A         | TNF-receptor, activator of NF- $\kappa$ B; regulator of interaction between T and dendritic cells                                   | 1.21<br>(0.009)        | 1.14<br>(0.03)   | 1.17<br>(0.007)    |
| p50               | 50 kD DNA binding subunit of NF- $\kappa$ B (NFKB1)                                                                                 | 1.18<br>(0.01)         | 1.12<br>(0.04)   | n.s.               |
| p100              | transcriptional coactivator (NFKB2); processed into the p52 NF- $\kappa$ B subunit; involved in dendritic cell differentiation      | 1.31<br>(0.01)         | 1.23<br>(0.02)   | n.s.               |
| RelB              | transcriptional corepressor of NF- $\kappa$ B; involved in T and dendritic cell differentiation                                     | n.s.                   | 1.18<br>(0.02)   | n.s.               |
| A20               | antagonist of NF- $\kappa$ B                                                                                                        | 1.29                   | 1.26             | n.s.               |

|       |                                                                                                                  |                 |                 |                 |
|-------|------------------------------------------------------------------------------------------------------------------|-----------------|-----------------|-----------------|
|       | signalling; inhibition of association of TRAF6 and NIK                                                           | (0.03)          | (0.01)          |                 |
| IκBa  | inhibition of translocation to nucleus of NF-κB                                                                  | 1.39<br>(0.009) | 1.38<br>(0.01)  | 1.24<br>(0.03)  |
| BCL3  | inhibition of translocation to nucleus of NF-κB                                                                  | 1.37<br>(0.01)  | 1.55<br>(0.006) | 1.41<br>(0.03)  |
| IL-2  | essential role in the immune response to antigenic stimuli; proliferation of T and B lymphocytes                 | n.s.            | 1.16<br>(0.049) | n.s.            |
| IL-7  | important for B and T cell development and cell survival                                                         | n.s.            | 1.43<br>(0.04)  | n.s.            |
| IL-8  | T cell chemotactic factor; angiogenic factor; mediates inflammatory responses                                    | n.s.            | 1.34<br>(0.03)  | n.s.            |
| SOCS3 | Suppresses pro-inflammatory cytokine signalling; inhibitor of JAK2 and STAT3 signalling                          | n.s.            | 1.32<br>(0.046) | n.s.            |
| ADM   | Suppresses pro-inflammatory cytokines, chemokines and NO production; inhibits T cell proliferation, induces Treg | n.s.            | n.s.            | 1.32<br>(0.026) |

The numbers indicate fold-changes with corresponding P-values; only statistically significant fold-changes are shown (Bayesian paired t-test, significance threshold  $P < 0.05$ ). AID (AICDA); APRIL (TNFSF13); A20 (TNFAIP3); BAFF (TNFSF13B); IκBα (NFKBIA); ADM (adrenomedullin). "n.s." for "no significantly different expression found between bacterial and placebo control treatments". Data based on expression profiles from eight healthy adult individuals.

<sup>1</sup> very low basal expression
