# Supplementary material
Source: PubMed Central journal article supplement (PMC2650163)
Supplement: 0809919106_ST6_PDF.pdf [file 0809919106_ST6_PDF.pdf]

Table S8. LCM-QPCR contributes to measurement of cell-specific gene expression

| Gene    | Total biopsy (n=30) | LCM (n=30)      | LCM/total biopsy  |
|---------|---------------------|-----------------|-------------------|
| SLC11A2 | 130 ( $\pm$ 23)     | 187 ( $\pm$ 38) | 1.43              |
| EGLN3   | 61 ( $\pm$ 7)       | 130 ( $\pm$ 16) | 2.12 <sup>a</sup> |
| CXCL2   | 77 ( $\pm$ 21)      | 175 ( $\pm$ 27) | 2.28 <sup>a</sup> |
| CD55    | 68 ( $\pm$ 12)      | 153 ( $\pm$ 26) | 2.26 <sup>a</sup> |
| CCL20   | 84 ( $\pm$ 27)      | 50 ( $\pm$ 19)  | 0.59              |
| PSMB8   | 193 ( $\pm$ 26)     | 143 ( $\pm$ 18) | 0.74 <sup>a</sup> |
| AQP10   | 157 ( $\pm$ 19)     | 328 ( $\pm$ 60) | 2.09 <sup>a</sup> |

Amounts are in arbitrary units (a.u.); the GAPDH reference expression was set to 100 a.u. *n* reflects the individual reactions and samples.

<sup>a</sup>Significant difference in RNA abundance in total biopsy RNA or LCM samples as calculated by t-test in MS Excel ( $P < 0.05$ ).
